# Supplementary material for: The Availability of Essential Antimicrobials in Public and Private Sector Facilities: A Cross-Sectional Survey in a District of North India
Source: MDPI journal article supplement (doi:10.3390/antibiotics13020131), 2024-01-29
Supplement: s1 [file s1]

**Table S1. Selected (secondary) list of antibiotics for survey**

| S. No. | ANTIBIOTICS                   | Formulation | Strength              | Healthcare facility level |
|--------|-------------------------------|-------------|-----------------------|---------------------------|
| 1.     | Amoxicillin                   | Capsule     | 250 mg, 500 mg        | P,S,T                     |
|        |                               | Suspension  | 125 mg/ 5 mL          | P,S,T                     |
| 2.     | Amoxicillin + clavulanic acid | Tablet      | 500/125 mg            | P,S,T                     |
|        |                               | Injection   | 0.6 g, 1.2 g          | S,T                       |
|        |                               | Suspension  | 228.5 mg/5 mL         | P,S,T                     |
| 3.     | Cefazolin                     | Injection   | 500 mg, 1 g           | P,S,T                     |
| 4.     | Cefuroxime                    | Injection   | 750 mg/ 1.5 g         | S,T                       |
| 5.     | Cefixime                      | Tablet      | 100, 200, 400 mg      | S,T                       |
|        |                               | Syrup       | 50 mg/ 5 mL           | S,T                       |
| 6.     | Ceftriaxone                   | Injection   | 250 mg, 500 mg, 1 g   | S,T                       |
| 7.     | Azithromycin                  | Tablet      | 250 mg, 500 mg        | P,S,T                     |
|        |                               | Injection   | 500 mg                | S,T                       |
|        |                               | Suspension  | 200 mg/ 5 mL          | P,S,T                     |
| 8.     | Ciprofloxacin                 | Tablet      | 250 mg, 500 mg        | P,S,T                     |
|        |                               | Injection   | 200 mg/100 mL         | P,S,T                     |
| 9.     | Levofloxacin                  | Tablet      | 500 mg                | S,T                       |
| 10.    | Norfloxacin                   | Tablet      | 400 mg                | P,S,T                     |
| 11.    | Ofloxacin                     | Tablet      | 100, 200, 400 mg      | S,T                       |
| 12.    | Cotrimoxazole                 | Tablet      | 400/80, 800/160 mg    | P,S,T                     |
|        |                               | Suspension  | 200+40 mg/ 5 mL       | P,S,T                     |
| 13.    | Doxycycline                   | Capsule     | 100 mg                | P,S,T                     |
| 14.    | Amikacin                      | Injection   | 100, 250, 500 mg/2 mL | P,S,T                     |
| 15.    | Metronidazole                 | Tablet      | 200 mg, 400 mg        | P,S,T                     |
|        |                               | Injection   | 500 mg/ 100 mL        | P,S,T                     |
|        |                               | Suspension  | 200 mg/ 5 mL          | P,S,T                     |
| 16.    | Vancomycin                    | Injection   | 250 mg, 500 mg, 1 g   | T                         |
| 17.    | Nitrofurantoin                | Tablet      | 100 mg                | P,S,T                     |
| 18.    | Linezolid                     | Tablet      | 600 mg                | T                         |
|        |                               | Infusion    | 2 mg/mL 100, 300mL    | T                         |
| 19.    | Meropenem                     | Injection   | 250 mg, 500 mg, 1 g   | T                         |

**Table S2. Selected (secondary) list of other antimicrobials for survey**

| S. No.         | Name of antimicrobial    | Formulation | Strength              | Healthcare facility level |
|----------------|--------------------------|-------------|-----------------------|---------------------------|
| ANTHELMINTHICS |                          |             |                       |                           |
| 1.             | Albendazole              | Tablet      | 400 mg                | P,S,T                     |
|                |                          | Suspension  | 200 mg/ 5 mL          | P,S,T                     |
| 2.             | Ivermectin               | Tablet      | 6 mg                  | P,S,T                     |
| ANTIVIRALS     |                          |             |                       |                           |
| 3.             | Acyclovir                | Tablet      | 200 mg, 400 mg        | P,S,T                     |
|                |                          | Injection   | 250 mg, 500 mg        | S,T                       |
|                |                          | Suspension  | 400 mg/ 5 mL          | T                         |
| 4.             | Oseltamivir              | Tablet      | 75 mg                 | P,S,T                     |
|                |                          | Syrup       | 6 mg/ mL, 60 mL       | P,S,T                     |
| ANTIFUNGALS    |                          |             |                       |                           |
| 5.             | Liposomal Amphotericin B | Injection   | 50 mg/ vial           | S, T                      |
| 6.             | Clotrimazole             | Pessary     | 100 mg, 200 mg        | P,S,T                     |
| 7.             | Fluconazole              | Tablet      | 100, 150, 200, 400 mg | P,S,T                     |
|                |                          | Injection   | 2 mg/ mL              | T                         |
| 8.             | Itraconazole             | Tablet      | 200 mg                | P,S,T                     |
| 9.             | Voriconazole             | Tablet      | 200 mg                | T                         |
|                |                          | Injection   | 200 mg                | T                         |
| ANTIPROTOZOALS |                          |             |                       |                           |
| 10.            | Tinidazole               | Tablet      | 500 mg                | P,S,T                     |

**Table S3. List of anti-infective medicines included in NLEM 2015.**

| National List of Essential Medicines (NLEM) 2015 |                  |                     |                                                                                                                                                                     |
|--------------------------------------------------|------------------|---------------------|---------------------------------------------------------------------------------------------------------------------------------------------------------------------|
| 5.7                                              | Phenobarbitone   | P,S,T               | Tablet 30 mgTablet 60 mgOral liquid 20 mg/5 ml                                                                                                                      |
|                                                  |                  | S,T                 | Injection 200 mg/ml                                                                                                                                                 |
| 5.8                                              | Phenytoin        | P,S,T               | Tablet 50 mg<br>Tablet 100 mg<br>Tablet 300 mg<br>ER Tablet 300 mg<br>Oral liquid 30 mg/5 ml<br>Oral liquid 125 mg/5 ml<br>Injection 25 mg/ml<br>Injection 50 mg/ml |
| 5.9                                              | Sodium valproate | P,S,T               | Tablet 200 mg<br>Tablet 300 mg<br>CR Tablet 300 mg<br>Tablet 500 mg<br>CR Tablet 500 mg<br>Oral liquid 200 mg/5ml                                                   |
|                                                  |                  | T                   | Injection 100 mg/ml                                                                                                                                                 |
| Section 6–Anti infective medicines               |                  |                     |                                                                                                                                                                     |
| 6.1–Anthelminthics                               |                  |                     |                                                                                                                                                                     |
| 6.1.1–Intestinal anthelminthics                  |                  |                     |                                                                                                                                                                     |
|                                                  | Medicine         | Level of Healthcare | Dosage form and strength                                                                                                                                            |
| 6.1.1.1                                          | Albendazole      | P,S,T               | Tablet 400 mg<br>Oral liquid 200 mg/5 ml                                                                                                                            |

**National List of Essential Medicines (NLEM) 2015**

|                                                               |                    |                            |                                                             |
|---------------------------------------------------------------|--------------------|----------------------------|-------------------------------------------------------------|
| 6.1.1.2                                                       | Mebendazole        | P,S,T                      | Tablet 100 mg<br>Oral liquid 100 mg/5 ml                    |
| <b>6.1.2–Antifilarial</b>                                     |                    |                            |                                                             |
|                                                               | <b>Medicine</b>    | <b>Level of Healthcare</b> | <b>Dosage form and strength</b>                             |
| 6.1.2.1                                                       | Diethylcarbamazine | P,S,T                      | Tablet 50 mg<br>Tablet 100 mg<br>Oral liquid 120 mg/5 ml    |
| <b>6.1.3–Anti-schistosomal &amp; anti-trematodal medicine</b> |                    |                            |                                                             |
|                                                               | <b>Medicine</b>    | <b>Level of Healthcare</b> | <b>Dosage form and strength</b>                             |
| 6.1.3.1                                                       | Praziquantel       | S,T                        | Tablet 600 mg                                               |
| <b>6.2–Antibacterials</b>                                     |                    |                            |                                                             |
| <b>6.2.1–Beta lactam medicines</b>                            |                    |                            |                                                             |
|                                                               | <b>Medicine</b>    | <b>Level of Healthcare</b> | <b>Dosage form and strength</b>                             |
| 6.2.1.1                                                       | Amoxicillin        | P,S,T                      | Capsule 250 mg<br>Capsule 500 mg<br>Oral liquid 250 mg/5 ml |

### National List of Essential Medicines (NLEM) 2015

|         |                                       |       |                                                                                                                      |
|---------|---------------------------------------|-------|----------------------------------------------------------------------------------------------------------------------|
| 6.2.1.2 | Amoxicillin (A) + Clavulanic acid (B) | P,S,T | Tablet 500 mg (A) + 125 mg (B)<br>Oral liquid 200 mg (A) + 28.5 mg (B)/5 ml<br>Dry Syrup 125 mg (A) + 31.25 (B)/5 ml |
|         |                                       | S,T   | Powder for Injection 500 mg (A) + 100 mg (B)<br>Powder for Injection 1 g (A) + 200 mg (B)                            |
| 6.2.1.3 | Ampicillin                            | P,S,T | Powder for Injection 500 mg<br>Powder for Injection 1 g                                                              |
| 6.2.1.4 | Benzathine benzylpenicillin           | P,S,T | Powder for Injection 6 lac units<br>Powder for Injection 12 lac units                                                |
| 6.2.1.5 | Benzyl penicillin                     | P,S,T | Powder for Injection 10 lac units                                                                                    |
| 6.2.1.6 | Cefadroxil                            | P,S,T | Tablet 500 mg<br>Tablet 1 g<br>Oral liquid 125 mg/5 ml                                                               |
| 6.2.1.7 | Cefazolin                             | P,S,T | Powder for Injection 500 mg<br>Powder for Injection 1 g                                                              |

**National List of Essential Medicines (NLEM) 2015**

|          |                                   |       |                                                                                                                                     |
|----------|-----------------------------------|-------|-------------------------------------------------------------------------------------------------------------------------------------|
| 6.2.1.8  | Cefixime                          | S,T   | Tablet 200 mg<br>Tablet 400 mg<br>Oral liquid 50 mg/5 ml<br>Oral liquid 100 mg/5 ml                                                 |
| 6.2.1.9  | Cefotaxime                        | S,T   | Powder for Injection 250 mg<br>Powder for Injection 500 mg<br>Powder for Injection 1 g                                              |
| 6.2.1.10 | Ceftazidime                       | S,T   | Powder for Injection 250 mg<br>Powder for Injection 1 g                                                                             |
| 6.2.1.11 | Ceftriaxone                       | S,T   | Powder for Injection 250 mg<br>Powder for Injection 500 mg<br>Powder for Injection 1 g<br>Powder for Injection 2 g                  |
| 6.2.1.12 | Cloxacillin                       | P,S,T | Capsule 250 mg<br>Capsule 500 mg<br>Oral Liquid 125 mg/5 ml<br>Powder for Injection 250 mg                                          |
| 6.2.1.13 | Piperacillin (A) + Tazobactam (B) | T     | Powder for Injection 1 g (A) + 125 mg (B)<br>Powder for Injection 2 g (A) + 250 mg (B)<br>Powder for Injection 4 g (A) + 500 mg (B) |

**National List of Essential Medicines (NLEM) 2015**

| <b>6.2.2–Other antibacterials</b> |                                                                 |                            |                                                                                                            |
|-----------------------------------|-----------------------------------------------------------------|----------------------------|------------------------------------------------------------------------------------------------------------|
|                                   | <b>Medicine</b>                                                 | <b>Level of Healthcare</b> | <b>Dosage form and strength</b>                                                                            |
| 6.2.2.1                           | Azithromycin                                                    | P,S,T                      | Tablet 250 mg<br>Tablet 500 mg<br>Oral liquid 200 mg/5ml<br>Powder for Injection 500 mg                    |
| 6.2.2.2                           | Ciprofloxacin                                                   | P,S,T                      | Tablet 250 mg<br>Tablet 500 mg<br>Oral liquid 250 mg/5ml<br>Injection 200 mg/100 ml                        |
| 6.2.2.3                           | Clarithromycin                                                  | S,T                        | Tablet 250 mg<br>Tablet 500 mg<br>Oral liquid 125mg/5 ml                                                   |
| 6.2.2.4                           | Co-trimoxazole<br>[Sulphamethoxazole (A) +<br>Trimethoprim (B)] | P,S,T                      | Tablet 400 mg (A) + 80 mg (B)<br>Tablet 800 mg (A) + 160 mg (B)<br>Oral liquid 200 mg (A) + 40 mg (B)/5 ml |
| 6.2.2.5                           | Doxycycline                                                     | P,S,T                      | Capsule 100 mg<br>Dry Syrup 50mg/5 ml                                                                      |
| 6.2.2.6                           | Gentamicin                                                      | P,S,T                      | Injection 10 mg/ml<br>Injection 40 mg/ml                                                                   |
| 6.2.2.7                           | Metronidazole                                                   | P,S,T                      | Tablet 200 mg<br>Tablet 400 mg<br>Oral liquid 200 mg/5 ml<br>Injection 500 mg/100 ml                       |
| 6.2.2.8                           | Nitrofurantoin                                                  | P,S,T                      | Tablet 100 mg<br>Oral liquid 25 mg/5 ml                                                                    |

### National List of Essential Medicines (NLEM) 2015

|                                         |                 |                            |                                                                                        |
|-----------------------------------------|-----------------|----------------------------|----------------------------------------------------------------------------------------|
| 6.2.2.9                                 | Vancomycin      | T                          | Powder for Injection 250 mg<br>Powder for Injection 500 mg<br>Powder for Injection 1 g |
| <b>6.2.3–Antileprosy medicines</b>      |                 |                            |                                                                                        |
|                                         | <b>Medicine</b> | <b>Level of Healthcare</b> | <b>Dosage form and strength</b>                                                        |
| 6.2.3.1                                 | Clofazimine     | P,S,T                      | Capsule 50 mg<br>Capsule 100 mg                                                        |
| 6.2.3.2                                 | Dapsone         | P,S,T                      | Tablet 25 mg<br>Tablet 50 mg<br>Tablet 100 mg                                          |
| 6.2.3.3                                 | Rifampicin      | P,S,T                      | Capsule 150 mg<br>Capsule 300 mg                                                       |
| <b>6.2.4–Antituberculosis medicines</b> |                 |                            |                                                                                        |
|                                         | <b>Medicine</b> | <b>Level of Healthcare</b> | <b>Dosage form and strength</b>                                                        |
| 6.2.4.1                                 | Capreomycin     | P, S, T                    | Powder for Injection 1 g                                                               |
| 6.2.4.2                                 | Cycloserine     | P, S, T                    | Capsule 125 mg<br>Capsule 250 mg                                                       |
| 6.2.4.3                                 | Ethambutol      | P,S,T                      | Tablet 200 mg<br>Tablet 400 mg<br>Tablet 600 mg<br>Tablet 800 mg                       |
| 6.2.4.4                                 | Ethionamide     | P, S, T                    | Tablet 125 mg<br>Tablet 250 mg                                                         |



### National List of Essential Medicines (NLEM) 2015

|                                 |                                                                                         |                            |                                                                                                 |
|---------------------------------|-----------------------------------------------------------------------------------------|----------------------------|-------------------------------------------------------------------------------------------------|
| 6.2.4.1<br>3                    | Rifampicin                                                                              | P,S,T                      | Capsule 150 mg<br>Capsule 300 mg<br>Capsule 450 mg<br>Capsule 600 mg<br>Oral liquid 100 mg/5 ml |
| 6.2.4.1<br>4                    | Streptomycin                                                                            | P,S,T                      | Powder for Injection 750 mg<br>Powder for Injection 1 g                                         |
| <b>6.3–Antifungal medicines</b> |                                                                                         |                            |                                                                                                 |
|                                 | <b>Medicine</b>                                                                         | <b>Level of Healthcare</b> | <b>Dosage form and strength</b>                                                                 |
| 6.3.1                           | Amphotericin B<br>a) Amphotericin B (conventional)<br>b) Lipid/Liposomal Amphotericin B | S,T                        | Powder for Injection 50 mg                                                                      |
| 6.3.2                           | Clotrimazole                                                                            | P,S,T                      | Pessary 100 mg                                                                                  |
| 6.3.3                           | Fluconazole                                                                             | P,S,T                      | Tablet 100 mgTablet 150 mgTablet 200 mgTablet 400 mgOral liquid 50 mg/5 ml                      |
|                                 |                                                                                         | S,T                        | Injection 200 mg /100 ml                                                                        |
| 6.3.4                           | Griseofulvin                                                                            | P,S,T                      | Tablet 125 mg<br>Tablet 250 mg<br>Tablet 375 mg                                                 |

### National List of Essential Medicines (NLEM) 2015

|                                                            |                 |                            |                                                                                                                         |
|------------------------------------------------------------|-----------------|----------------------------|-------------------------------------------------------------------------------------------------------------------------|
| 6.3.5                                                      | Nystatin        | P,S,T                      | Tablet 500,000 IU<br>Pessary 100,000 IU<br>Oral Liquid 100, 000 IU/ml                                                   |
| <b>6.4–Antiviral medicines</b>                             |                 |                            |                                                                                                                         |
| <b>6.4.1–Antih herpes medicines</b>                        |                 |                            |                                                                                                                         |
|                                                            | <b>Medicine</b> | <b>Level of Healthcare</b> | <b>Dosage form and strength</b>                                                                                         |
| 6.4.1.1                                                    | Acyclovir       | P,S,T                      | Tablet 200 mg<br>Tablet 400 mg<br>Powder for Injection 250 mg<br>Powder for Injection 500 mg<br>Oral liquid 400 mg/5 ml |
| <b>6.4.2–Anti Cytomegalovirus (CMV) medicines</b>          |                 |                            |                                                                                                                         |
| 6.4.2.1                                                    | Ganciclovir     | S,T                        | Capsule 250 mg<br>Powder for Injection 500 mg                                                                           |
| <b>6.4.3–Antiretroviral medicines</b>                      |                 |                            |                                                                                                                         |
| <b>6.4.3.1–Nucleoside reverse transcriptase inhibitors</b> |                 |                            |                                                                                                                         |
|                                                            | <b>Medicine</b> | <b>Level of Healthcare</b> | <b>Dosage form and strength</b>                                                                                         |
| 6.4.3.1.1                                                  | Abacavir        | S,T                        | Tablet 60 mg<br>Tablet 300 mg                                                                                           |

## National List of Essential Medicines (NLEM) 2015

| Section 6.5–Antiprotozoal Medicines             |                                                                                                |                     |                                                                                      |
|-------------------------------------------------|------------------------------------------------------------------------------------------------|---------------------|--------------------------------------------------------------------------------------|
| 6.5.1–Antiamoebic and anti giardiasis medicines |                                                                                                |                     |                                                                                      |
|                                                 | Medicine                                                                                       | Level of Healthcare | Dosage form and strength                                                             |
| 6.5.1.1                                         | Diloxanide furoate                                                                             | P,S,T               | Tablet 500 mg                                                                        |
| 6.5.1.2                                         | Metronidazole                                                                                  | P,S,T               | Tablet 200 mg<br>Tablet 400 mg<br>Injection 500 mg/100 ml<br>Oral liquid 200 mg/5 ml |
| 6.5.2–Antileishmaniasis medicines               |                                                                                                |                     |                                                                                      |
|                                                 | Medicine                                                                                       | Level of Healthcare | Dosage form and strength                                                             |
| 6.5.2.1                                         | Amphotericin B<br>a) Amphotericin B (conventional)<br>b) Lipid/<br>Liposomal<br>Amphotericin B | S,T                 | Powder for Injection 50 mg                                                           |
| 6.5.2.2                                         | Miltefosine                                                                                    | P,S,T               | Capsule 10 mg<br>Capsule 50 mg\                                                      |
| 6.5.2.3                                         | Paromomycin                                                                                    | P,S,T               | Injection 375 mg/ml                                                                  |

**National List of Essential Medicines (NLEM) 2015**

| <b>6.5.3–Antimalarial medicines</b>   |                                                   |                            |                                                                                                                                                                                                                                                                                                         |
|---------------------------------------|---------------------------------------------------|----------------------------|---------------------------------------------------------------------------------------------------------------------------------------------------------------------------------------------------------------------------------------------------------------------------------------------------------|
| <b>6.5.3.1–For curative treatment</b> |                                                   |                            |                                                                                                                                                                                                                                                                                                         |
|                                       | <b>Medicine</b>                                   | <b>Level of Healthcare</b> | <b>Dosage form and strength</b>                                                                                                                                                                                                                                                                         |
| 6.5.3.1.1                             | Artemether (A) + Lumefantrine (B)                 | P,S,T                      | Tablet 20 mg (A) + 120 mg (B)<br>Tablet 40 mg (A) + 240 mg (B)<br>Tablet 80 mg (A) + 480 mg (B)<br>Oral liquid 80 mg (A) + 480 mg (B)/5 ml                                                                                                                                                              |
| 6.5.3.1.2                             | Artesunate                                        | P,S,T                      | Powder for Injection 60 mg<br>Powder for Injection 120 mg                                                                                                                                                                                                                                               |
| 6.5.3.1.3                             | Artesunate (A) + Sulphadoxine - Pyrimethamine (B) | P,S,T                      | Combi pack (A+B)<br>1 Tablet 25 mg (A) + 1 Tablet (250 mg + 12.5 mg) (B)<br>1 Tablet 50 mg (A) + 1 Tablet (500 mg + 25 mg) (B)<br>1 Tablet 100 mg (A) + 1 Tablet (750 mg + 37.5 mg) (B)<br>1 Tablet 150 mg (A) + 2 Tablet (500 mg + 25 mg) (B)<br>1 Tablet 200 mg (A) + 2 Tablet (750 mg + 37.5 mg) (B) |
| 6.5.3.1.4                             | Chloroquine                                       | P,S,T                      | Tablet 150 mg<br>Oral liquid 50 mg/5 ml                                                                                                                                                                                                                                                                 |
| 6.5.3.1.5                             | Clindamycin                                       | P,S,T                      | Capsule 150 mg<br>Capsule 300 mg                                                                                                                                                                                                                                                                        |

### National List of Essential Medicines (NLEM) 2015

|                                                                 |                                                           |                            |                                                                                                                                                                |
|-----------------------------------------------------------------|-----------------------------------------------------------|----------------------------|----------------------------------------------------------------------------------------------------------------------------------------------------------------|
| 6.5.3.1.6                                                       | Primaquine                                                | P,S,T                      | Tablet 2.5 mg<br>Tablet 7.5 mg<br>Tablet 15 mg                                                                                                                 |
| 6.5.3.1.7                                                       | Quinine                                                   | P,S,T                      | Tablet 300 mg<br>Injection 300 mg/ml                                                                                                                           |
| <b>6.5.3.2–For prophylaxis</b>                                  |                                                           |                            |                                                                                                                                                                |
|                                                                 | <b>Medicine</b>                                           | <b>Level of Healthcare</b> | <b>Dosage form and strength</b>                                                                                                                                |
| 6.5.3.2.1                                                       | Mefloquine                                                | T                          | Tablet 250 mg<br>*Only for use as chemoprophylaxis for long term travellers like military and travel troops, travelling from low endemic to high endemic area. |
| <b>6.5.4–Antipneumocystosis and antitoxoplasmosis medicines</b> |                                                           |                            |                                                                                                                                                                |
|                                                                 | <b>Medicine</b>                                           | <b>Level of Healthcare</b> | <b>Dosage form and strength</b>                                                                                                                                |
| 6.5.4.1                                                         | Co-trimoxazole [Sulphamethoxazole (A) + Trimethoprim (B)] | P,S,T                      | Tablet 400 mg (A) + 80 mg (B)<br>Tablet 800 mg (A) + 160 mg (B)<br>Oral liquid 200 mg (A) + 40 mg (B)/5 ml                                                     |
| 6.5.4.2                                                         | Pentamidine                                               | S,T                        | Powder for Injection 200 mg                                                                                                                                    |

**Table S4. List of anti-infective medicines added in NLEM 2022.**

**Medicines Added  
Therapeutic category  
wise in  
NLEM 2022**

**National List of Essential Medicines (NLEM) 2022**

| Section 6<br>Anti-infective medicines |          |                           |                     |                                                                                             |
|---------------------------------------|----------|---------------------------|---------------------|---------------------------------------------------------------------------------------------|
| <b>6.1.2 -Antifilarial</b>            |          |                           |                     |                                                                                             |
|                                       |          | Medicine                  | Level of Healthcare | Dosage form(s) and strength(s)                                                              |
| 1                                     | 6.1.5    | Ivermectin                | P,S,T               | Tablet 6 mg<br>Tablet 12 mg                                                                 |
| <b>6.2-Antibacterials</b>             |          |                           |                     |                                                                                             |
| <b>6.2.1 – Beta-lactam Medicines</b>  |          |                           |                     |                                                                                             |
| 2                                     | 6.2.1.14 | Meropenem                 | T                   | Powder for Injection 500 mg (as trihydrate)<br>Powder for Injection 1000 mg (as trihydrate) |
| <b>6.2.2 - Other antibacterials</b>   |          |                           |                     |                                                                                             |
|                                       |          | Medicine                  | Level of Healthcare | Dosage form(s) and strength(s)                                                              |
| 3                                     | 6.2.2.2  | Cefuroxime                | P,S,T               | Tablet 500 mg<br>Syrup 125 mg/ 5 mL (p)<br>Injection 1500 mg                                |
| 4                                     | 6.2.2.11 | Phenoxymethyl penicillin  | P,S,T               | Tablet 250 mg                                                                               |
| 5                                     | 6.2.2.12 | Procaine Benzylpenicillin | P,S,T               | Powder for injection<br>1000 mg (=1 million IU)                                             |
| <b>6.4-Antituberculosis medicines</b> |          |                           |                     |                                                                                             |



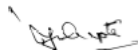

### National List of Essential Medicines (NLEM) 2022

|                                                     | Medicine |                | Level of Healthcare | Dosage form(s) and strength(s)                                    |
|-----------------------------------------------------|----------|----------------|---------------------|-------------------------------------------------------------------|
| 6                                                   | 6.4.1    | Amikacin       | S,T                 | Injection 100 mg/mL<br>Injection 250 mg/mL<br>Injection 500 mg/mL |
| 7                                                   | 6.4.2    | Bedaquiline    | T                   | Tablet 100 mg                                                     |
| 8                                                   | 6.4.7    | Delamanid      | T                   | Tablet 50 mg                                                      |
| <b>6.5-Antifungal medicines</b>                     |          |                |                     |                                                                   |
|                                                     | Medicine |                | Level of Healthcare | Dosage form(s) and strength(s)                                    |
| 9                                                   | 6.5.5    | Itraconazole   | S,T                 | Capsule 100 mg<br>Capsule 200 mg<br>Oral liquid 10 mg/mL          |
| 10                                                  | 6.5.6    | Mupirocin      | P,S,T               | Ointment 2%                                                       |
| 11                                                  | 6.5.8    | Terbinafine    | P,S,T               | Cream 1%                                                          |
| <b>6.6.2 - Anti-Cytomegalovirus (CMV) medicines</b> |          |                |                     |                                                                   |
|                                                     | Medicine |                | Level of Healthcare | Dosage form(s) and strength(s)                                    |
| 12                                                  | 6.6.2.1  | Valganciclovir | S, T                | Tablet 450 mg<br>Powder for oral solution 50 mg/mL                |

*Signature*  
Moulay

*Signature*
