# Supplementary material for: The Availability of Essential Antimicrobials in Public and Private Sector Facilities: A Cross-Sectional Survey in a District of North India
Source: MDPI journal article supplement (doi:10.3390/antibiotics13020131), 2024-01-29
Supplement: s1 [file s1]

| DISTRICTWISE PRIMARY HEALTH CENTRES / SUB CENTRES IN Haryana |      |                                                                                                                                                                                                                                                                                                                                                                                                         |             |
|--------------------------------------------------------------|------|---------------------------------------------------------------------------------------------------------------------------------------------------------------------------------------------------------------------------------------------------------------------------------------------------------------------------------------------------------------------------------------------------------|-------------|
| District                                                     | PHCs |                                                                                                                                                                                                                                                                                                                                                                                                         | Sub-Centres |
|                                                              | No   | Location                                                                                                                                                                                                                                                                                                                                                                                                | No.         |
| Ambala                                                       | 22   | Mullana, Chaurmastpur, Shahzadpur, Brara, Bihta, Noorpur, Patrehri, Ugala, Kurali, Samlehri, Panjokhara, TharwaMajri, Ambli, Nauhani, Naggal, Boh, Saha, Kesari, Dhanana, Bhurewala, Nanyola, Chandsoli                                                                                                                                                                                                 | 104         |
| Bhiwani                                                      | 29   | Kairu, Manheru, Jamalpur, Tosham, Loharu, Dhanana, Miran, Nakipur, Chang, Pur, Sui, Dinod, Behal, Biran, Alakhpura, Sohasara, Bamla, Jui, Lilas, Jhumpakalan, Gurera, Barwa, Kharakkalan, Talu, Dhigawa, Sandwa, Nandgaon, Dhanimahu, Jattan.                                                                                                                                                           | 144         |
| Charkhi Dadri                                                | 15   | Gopi, Bondkalan, Jhojukalan, Maikalan, Hirodi, Manakawas, Ranila, Achina, Santokhpura, Chhapar, Kadma, Balkara, Badhra, Sanwar, Imlota,                                                                                                                                                                                                                                                                 | 76          |
| Faridabad                                                    | 16   | Kurali, Palli Kherikalan, Tigaon, Dhouj, , PunheraKhurd, Mohna, Palla, Anangpur, , Fatehpur-billoch, Chhainsa, Fatehpur -Taga, Sikri , Dayalpur, Khabrakalan, Hijranwankalan                                                                                                                                                                                                                            | 58          |
| Fatehabad                                                    | 24   | Bhattukalan, Bhuna, Jakhal, Badopal Ratia, Jhalnia, , Birdhana, Mohamadpurrohi, Samain, Bothankalan, Bangaon, Kulan, Pirthala, Meaondkalan, Nehla, Mamupur, Pilimandori, Nagpur, Indachhui, Hassnga, Mahmara, Aharwan, Khiarati -Khera, Bighar                                                                                                                                                          | 137         |
| Gurugram                                                     | 15   | Farukhnagar, Bhorakalan, Pataudi, Ghangola, Badshahpur, Bhangrola, Mandpura, Kasan, Gurgaon-Village, Garhi-harsaru, Bhondsi, Wazirabad, , Daultabad, Nakhrola, Palra.                                                                                                                                                                                                                                   | 76          |
| Hisar                                                        | 39   | Siswal, , Mangali, Aryanagar, Uklana, Mirchpur, Sisaibola, Adampur, Sorkhi, Khanda-Kheri, Ladwa, Satrod kalan, Dhansu, Pabra, Puttimangalkhan, Neolikalan, Umra, Bass, Puttisamain, Chaudhrywas, Nalwa, Agroha, Kajlan, Dobhi, Gawar, Gurana, Talwandi-Ruka, Datta, Balsamand, Kaimri, Hassangarh, Daulatupur, Chulibagrian, , Landri, Thurana, Banbhor, Bichpari, Kheri-Lohchab, Khandakheri, Sindhar. | 200         |
| Jhajjar                                                      | 27   | Dighal, Dhakla, Jamalpur, Dubaldhan, Badli, Chhara, Jahaigarh, Chhudani, Dujana, Birohar, Matanhail, Silani, Dubaldhan-Majra, Badsha, Mandothi, Machrauli, Bambheva, BahuJholri, Tumbaheri, Jassaurkheri, Jahangirpur, Chhuchhakwas, Salhawas, Nunamajra, Kanonda, Patauda, Bahrana.                                                                                                                    | 126         |
| Jind                                                         | 33   | Safidon , Jullana, Kalwa, Kharakramji, Ujhana, Kandela, Muana, Alewa, Gogrian, Shamlokalan, Rajauna-kalan, Amargarh, Deola, Dhatrath, Dhanauri, Dhamtan-Sahib, Chhatar, Ramrai, Jaijaiwanti, Nidhana, Dariyawala, Durjanpur, Dhanodakalan, Hatt, Sinsar, Sawanmal, Dumarkhan-Khurd, Naguran, Karsindhu, Karamgarh, Dahola, Uchana Kuard, Kinana.                                                        | 169         |
| Kaithal                                                      | 25   | Kaul, Siwan, Rajaund, Pundri, Padla, Bhagal, Dhand, Keorak, Pai, Habri, Mundri, Kangthali, Karora, Deban, Kithana, Rasina, Jakhauli, Kharkan, Batta, Balu,Teek, Arnauli, Pharal, Agondh, Sajuma.                                                                                                                                                                                                        | 144         |
| Karnal                                                       | 32   | Taraori, Nissing, Gharaunda, Kunjpura, Ballah, Kachwa, Nigdu, , Kutail, Khukhni, Madhuban, Jundla, Barsat, Gheer, Barota, Sambhli, Gagseena, Chaura, Bhadson, Uplana, Salwan, Popra, Sagga, Jalmana, Gonder, Gudha, Ramba, Mirghan, Padha, Pardhana, Samana Bahu, Bayana, Munak.                                                                                                                        | 151         |
| Kurukshetra                                                  | 22   | Pehowa, Ladwa, Mathana, Jhansa, Barana, Babain, Pipli, Khanpurkohlian, Thaska-miranji, Dhurala, Siana-Saidan, Kirmach, Ismailabad, Deegh, Kalsana, Tatka, Gudha, Amin, Thol, Ramgarh-road, Barot, Sarsa                                                                                                                                                                                                 | 118         |
| Nuh                                                          | 22   | Nuh, Firozpur-zhirka, Punhana, Ujina, Tauru, Mohammadpur-ahir, Ghasera, , Singar, Pinangwan, Tigaon, Biwan, Marora, Nagina, Padheni, Jorasi, Sikrawa, Sudaka, Jamalgarh, Bicchor, Bai, Kaliyaka, Bisru.                                                                                                                                                                                                 | 138         |
| Narnaul                                                      | 25   | Kanina, Ateli, Nangal-sirohi, Nangal-Chaudhary , Satnali, Sehlong, Deochana, Madhogarh, Antri, Bhojawas, Sirohibihali, Bayal, Sihma, Budhwal, Balaha-kalan, Rampura, Pali, Dhanonda, Mirjapur-Bachhaud, , Mundiya- Khera, Chhilronizampur, Malrawas, Bamanwas, Mandhana, Bigopur.                                                                                                                       | 120         |
| Palwal                                                       | 20   | Aurangabad, Hathin, Sondhad, Alawalpur, Dadhola, Rasulpur, Tappa-bilochpur, Hasanpur, Solra, , Amarpur, Sihol, Mandkola, Uttawar, Naggaljatt, Kalsara, Bulwana, Alike, Kot, Deghot, Bhiduki.                                                                                                                                                                                                            | 89          |
| Panchkula                                                    | 09   | Raipurrani , Pinjore, Morni, Old-Panchkula, Barwala, Hangola, Kot, Nanakpur, Surajpur                                                                                                                                                                                                                                                                                                                   | 51          |
| Panipat                                                      | 20   | Ahar,Dadlana Bapauli, Mathloda , Naultha, Naraina, Khotpura, Siwah,                                                                                                                                                                                                                                                                                                                                     | 89          |

|                |            |                                                                                                                                                                                                                                                                                                                                                                        |             |
|----------------|------------|------------------------------------------------------------------------------------------------------------------------------------------------------------------------------------------------------------------------------------------------------------------------------------------------------------------------------------------------------------------------|-------------|
|                |            | Mandi, Seenkh, Ugrakheri, Pattikalayana, Kavi, Kabri, Ujha, Chulkana, Atta, Rairkalan, Israna, Brana                                                                                                                                                                                                                                                                   |             |
| Rewari         | 21         | Gurawara, Bawal, Nahar, Mirpur, Khol, Jatusana, Dahinajainabad, Dharuhera, Bassauda, Tankri, Fatehpuri, Bharawas, Kasola, Bawwa, Sangwari, Gudyani, Siha, Masani, Gangayacha –ahir, Bhotawas Ahir, Rathanthai                                                                                                                                                          | 112         |
| Rohtak         | 24         | Kalanaur, Sampla, Kilo, Chiri, Madina , Kahanaur, Pilana, Bahalaut, Girawar, Mokhra, Behlba, Hassangarh, Ballandh, Pakasma, Baniyani, Lakhanmajra, Sanghi, Kharwar, Samargopalpur, Ghilor-kalan, Farmana-badshpur, Karontha, Ismaila, Lakhan Majra                                                                                                                     | 115         |
| Sirsa          | 32         | Rania, Odhan, Baraguda, Kalanwali Nathusarichopta,, Madhosinghana, Ellenabad, Juttianwali, Malekan, Goriwala, Desujodha, Ding, Panihari, Rori, Darbi, Kharia, Darba-kalan, Jagmalera, Panniwala-mota, Keharwala, Randhawa, Kaluana, Dadu, Ganga, Bani, Dhottar, Jamal, Bhavdeen, Bansudhar, Chautala, Kanwarpura, Kaagdana.                                            | 157         |
| Sonapat        | 37         | Kharkhoda, Badkhalsa, Ganaur, Juan, Mundlana, Ferozpur-banger , Purkhas, Bhainswal-kalan, Gohana, Halalpur, Bega, Farmana, Jakhauli, Dubeta, Murthal, Bidhlana, Moi-majri, Butana-zafrabad, , Rukhi, Madina, , Khanpur- kalan, Banwasa, Butana, Lath, Rohat, Bhatgaon, Mahra, Jagsi, Sisana, Sargathal Shamri, Mohana, Barodamor, Ahulana, Kundli, Rajlugarhi, Dhatoli | 164         |
| Yamuna Nagar   | 22         | Naharpur, Saraswatinagar , Sadhaura, Chhachrauli, Bilaspur, Khizrabad, Radaur, Buria, Arnauli, Kalanaur, Sabepur, Kharwan, Kotmustraka, Muglanwali, Haibatpur, Alahar, Bhambol, Rasulpur, Antawa, Khadri, Ranjitpur, Mohri                                                                                                                                             | 112         |
| <b>G.TOTAL</b> | <b>531</b> |                                                                                                                                                                                                                                                                                                                                                                        | <b>2650</b> |

01.06.2020

| District wise list of U-PHCs FY. 2016-17 |                      |                                 |               |
|------------------------------------------|----------------------|---------------------------------|---------------|
| S.No.                                    | Name of the District | Name of Urban PHC               | No. of U-PHCs |
| 1                                        | Ambala               | Ravidas majri                   | 6             |
|                                          |                      | Baldev nagar                    |               |
|                                          |                      | Durga nagar (singawala)         |               |
|                                          |                      | Nishan Bagh behind mill         |               |
|                                          |                      | Palledar mohalaa (Cant)         |               |
|                                          |                      | Ekta vihar (chabiyana)          |               |
| 2                                        | Bhiwani              | M.C.Colony                      | 3             |
|                                          |                      | Dhana Ladanpur Road, Dadri gate |               |
|                                          |                      | Dinod Road                      |               |
| 3                                        | Faridabad            | Nangla Enclave                  | 13            |
|                                          |                      | Shiv Durga Colony               |               |
|                                          |                      | Subhash Colony                  |               |
|                                          |                      | Bharat Colony                   |               |
|                                          |                      | Partapgarh                      |               |
|                                          |                      | A.C. Nagar                      |               |
|                                          |                      | Mewla                           |               |
|                                          |                      | Saran                           |               |
|                                          |                      | Bhim Basti Sec-18               |               |
|                                          |                      | Aitmadpur                       |               |
|                                          |                      | Dabua                           |               |
|                                          |                      | Hari Vihar                      |               |
|                                          |                      | Adarsh Nagar                    |               |
| 4                                        | Fatehabad            | Ashok nagar                     | 2             |
|                                          |                      | Near Ratia                      |               |
|                                          |                      | Raj nagar                       | 1             |
| 5                                        | Gurgaon              | Rajiv Nagar (UrbanRCH)          | 18            |
|                                          |                      | Laxman Vihar (UrbanRCH)         |               |
|                                          |                      | Firoj Gandhi Colony (UrbanRCH)  |               |
|                                          |                      | OM Nagar(UrbanRCH)              |               |
|                                          |                      | Mullahera (UrbanRCH)            |               |
|                                          |                      | Khandsa (UrbanRCH)              |               |
|                                          |                      | Rajendera Park (UrbanRCH)       |               |
|                                          |                      | Gandhi Nagar                    |               |

|    |             |                               |   |
|----|-------------|-------------------------------|---|
|    |             | Basai Enclave                 |   |
|    |             | Surat Nagar                   |   |
|    |             | Chaumma                       |   |
|    |             | Nathupur                      |   |
|    |             | Fazilpur                      |   |
|    |             | Naharpur Roopa                |   |
|    |             | Sukhrali                      |   |
|    |             | Tigra                         |   |
|    |             | Patel Nagar (PPC)             |   |
|    |             | Manesar                       |   |
| 6  | Hisar       | Patel Nagar                   | 3 |
|    |             | Rishi Nagar (Ghoda farm Road) |   |
|    |             | Mahabir Colony                |   |
|    |             | Char Qutub Gate               | 1 |
| 7  | Jhajjar     | Silani Gate                   | 1 |
|    |             | Chhotu ram nagar              | 6 |
|    |             | Quila mohalla                 |   |
|    |             | Adarsh nagar                  |   |
|    |             | Ram nagar(barnala road)       |   |
|    |             | Vikas nagar                   |   |
|    |             | Netaji nagar                  |   |
| 8  | Jind        | Apollo road                   | 2 |
|    |             | Budha Baba Basti,Bhiwani road |   |
| 9  | Kaithal     | Shakti Nagar                  | 3 |
|    |             | GH OLD Hospital               |   |
|    |             | Near ITI, Jind Road           |   |
| 10 | Karnal      | Dhobi Mohalla                 | 4 |
|    |             | Indira Colony                 |   |
|    |             | Ram Nagar                     |   |
|    |             | Shiv Colony                   |   |
| 11 | Kurukshetra | Mohan nagar                   | 3 |
|    |             | Krishna nagar gamri           |   |
|    |             | Majri mohallah                |   |
| 12 | Palwal      | Kasba Mohalla                 | 2 |
|    |             | Sallagarh                     |   |

|                                   |             |                                                                       |    |
|-----------------------------------|-------------|-----------------------------------------------------------------------|----|
| 13                                | Panchkula   | Bhero ki Sher Kalka                                                   | 1  |
| 14                                | Panipat     | Peri Urban Ugrakheri                                                  | 6  |
|                                   |             | Raj Nagar                                                             |    |
|                                   |             | Rajeev Colony                                                         |    |
|                                   |             | Batra Colony                                                          |    |
|                                   |             | Khatik Basti                                                          |    |
|                                   |             | Hari Singh Colony (peri urban kabri)                                  |    |
| 15                                | Rewari      | Qutubpur                                                              | 3  |
|                                   |             | Rajeev Nagar                                                          |    |
|                                   |             | Daruheda                                                              |    |
| 16                                | Rohtak      | Gau Karan(roop nagar nehru colony)                                    | 4  |
|                                   |             | Rajendra Colony(Hari singh colony)                                    |    |
|                                   |             | Ekta Colony                                                           |    |
|                                   |             | Shukhpura Chownk                                                      |    |
| 17                                | Sirsa       | Chattatgarh patti                                                     | 4  |
|                                   |             | Khairpur                                                              |    |
|                                   |             | Inderpuri mohalla (JJ colony, Harijan basti + Rani chungi peer basti) |    |
|                                   |             | Ther mohalla                                                          |    |
|                                   |             | PHC Dabwali                                                           | 1  |
| 18                                | Sonapat     | Subhash Nagar                                                         | 3  |
|                                   |             | Kailash Colony (Patel nagar)                                          |    |
|                                   |             | Jatwara (Jamalpura)                                                   |    |
| 19                                | Yamunanagar | Azad nagar                                                            | 95 |
|                                   |             | Gandhi nagar                                                          |    |
|                                   |             | Ganganagar                                                            |    |
|                                   |             | Mukherjee Park                                                        |    |
|                                   |             | Old Hamida                                                            |    |
| Total                             |             |                                                                       | 95 |
| Note: Two FRUs in Distt Faridabad |             |                                                                       |    |

| DISTRICTWISE COMMUNITY HEALTH CENTRES |            |                                                                                                                                              |
|---------------------------------------|------------|----------------------------------------------------------------------------------------------------------------------------------------------|
| District                              | CHCs       |                                                                                                                                              |
|                                       | No         | Location                                                                                                                                     |
| Ambala                                | 5          | Mullana, Chaurmastpur, Shahzadpur, Brara, Ambli                                                                                              |
| Bhiwani                               | 7          | Kairu, Manheru, Jamalpur, Tosham,<br><b>50 Bedded CHC</b> Loharu.<br><b>Block PHC</b> Dhanana, Miran                                         |
| Charkhi Dadri                         | 3          | Gopi, Bondkalan, Jhojukalan,                                                                                                                 |
| Faridabad                             | 4          | Kurali Pali, Tigaon<br><b>Block PHC</b> Kheri Kalan                                                                                          |
| Fatehabad                             | 6          | Bhattukalan, Bhuna, Jakhal Badopal, Bothankalan<br><b>CHC cum 50 Bedded Hospital</b> Ratia                                                   |
| Gurugram                              | 4          | Farukhnagar, Bhora Kalan<br><b>50 Bedded CHC</b> Pataudi<br><b>Block PHC</b> Ghangola                                                        |
| Hisar                                 | 9          | Siswal, Mangali, Aryanagar Uklanan Mirchpur, SisaiBola, Khanda Kheri<br><b>CHC cum 50 Bedded Hospital</b> Adampur<br><b>Block PHC</b> Sorkhi |
| Jhajjar                               | 6          | Dighal, Dhakla, Jamalpur, Dubaldhan, Badli<br><b>Block PHC</b> Charra                                                                        |
| Jind                                  | 8          | Safidon, Jullana, Kalwa, Kharakramji, Ujhana, Kandela, Muana Alewa,                                                                          |
| Kaithal                               | 4          | Guhla, Kaul, Siwan, Rajaund, Pundri                                                                                                          |
| Karnal                                | 5          | Taraori, Nissing, Gharaunda,, Kunjpura<br><b>Block PHC</b> Ballah                                                                            |
| Kurukshetra                           | 6          | Pehowa, Ladwa, Mathana, Jhansa, <b>Barana</b> , Babain                                                                                       |
| Nuh                                   | 4          | Nuh, Ferozepur Zhirka, Punhana, <b>Tauru</b>                                                                                                 |
| Narnaul                               | 7          | Kanina,, Ateli, Nangal-sirohi, Nangal-chaudhry, Satnali, Sehlang<br><b>Functional</b> Dochana                                                |
| Palwal                                | 5          | Aurangabad, Hathin Sondhad, Alawalpur<br><b>Block PHC</b> Dudhola                                                                            |
| Panchkula                             | 2          | Raipurrani, Nanakpur                                                                                                                         |
| Panipat                               | 7          | Ahar Dadlana, Bapoli, Mathloda , <b>Naultha</b> , <b>Naraina</b> , khotpura                                                                  |
| Rewari                                | 5          | Gurawara, Bawal, Nahar, Mirpur, Khol                                                                                                         |
| Rohtak                                | 7          | Kahnaur, Sampla, Kilo, Chiri, Madina<br><b>50 Bedded CHC</b> Kalanaur Lakhan Majra                                                           |
| Sirsa                                 | 8          | Rania, Odhan , Bara-Gudda Kalanwali, Nathusari-Chopta , <u>Madhosinghana</u><br><b>CHC cum 50 Bedded Hospital</b> Ellenabad Chautala         |
| Sonipat                               | 9          | Kharkhauda, Badkhalsa, Ganaur, , Juan, Mundlana Firozepur -bangar Purkhas Bhainswal -kalan<br><b>50 Bedded CHC</b> Gohana                    |
| Yamuna Nagar                          | 7          | Naharpur, Saraswatinagar , Sadhaura,Chhachhrauli Bilaspur<br><b>Block PHC</b> Khizrabad<br><b>50 Bedded CHC</b> Radaur                       |
| <b>G.TOTAL</b>                        | <b>128</b> |                                                                                                                                              |

01.06.2020

Medicine India ([//www.medicineindia.org](http://www.medicineindia.org))  
/ Pharmacists,Chemists,Drugstores In India ([//www.medicineindia.org/pharmacies-chemists-drugstores-in-india](http://www.medicineindia.org/pharmacies-chemists-drugstores-in-india))  
/ Rohtak ([//www.medicineindia.org/pharmacies-chemists-drugstores-in-city/953/rohtak](http://www.medicineindia.org/pharmacies-chemists-drugstores-in-city/953/rohtak))

[+ Add New Pharmacy \(\[//www.medicineindia.org/pharmacies-chemists-drugstores-in-india/add-new-pharmacy\]\(http://www.medicineindia.org/pharmacies-chemists-drugstores-in-india/add-new-pharmacy\)\)](http://www.medicineindia.org/pharmacies-chemists-drugstores-in-india/add-new-pharmacy)

# Pharmacies, Chemists & Drugstores in Rohtak

Filter Pharmacies:

| Pharmacy/Chemist/Drugstore Name                                                                                                                                                                                                                                                                                                        |
|----------------------------------------------------------------------------------------------------------------------------------------------------------------------------------------------------------------------------------------------------------------------------------------------------------------------------------------|
| <a href="http://www.medicineindia.org/pharmacy-chemist-drugstore-details/79852/aasta-medical-store">Aasta Medical Store (<a href="http://www.medicineindia.org/pharmacy-chemist-drugstore-details/79852/aasta-medical-store">//www.medicineindia.org/pharmacy-chemist-drugstore-details/79852/aasta-medical-store</a>)</a>             |
| <a href="http://www.medicineindia.org/pharmacy-chemist-drugstore-details/79863/aggarwal-medical-store">Aggarwal Medical Store (<a href="http://www.medicineindia.org/pharmacy-chemist-drugstore-details/79863/aggarwal-medical-store">//www.medicineindia.org/pharmacy-chemist-drugstore-details/79863/aggarwal-medical-store</a>)</a> |
| <a href="http://www.medicineindia.org/pharmacy-chemist-drugstore-details/79915/aggarwal-medidla-store">Aggarwal Medidla Store (<a href="http://www.medicineindia.org/pharmacy-chemist-drugstore-details/79915/aggarwal-medidla-store">//www.medicineindia.org/pharmacy-chemist-drugstore-details/79915/aggarwal-medidla-store</a>)</a> |
| <a href="http://www.medicineindia.org/pharmacy-chemist-drugstore-details/79891/aghi-pharmacy">Aghi Pharmacy (<a href="http://www.medicineindia.org/pharmacy-chemist-drugstore-details/79891/aghi-pharmacy">//www.medicineindia.org/pharmacy-chemist-drugstore-details/79891/aghi-pharmacy</a>)</a>                                     |
| <a href="http://www.medicineindia.org/pharmacy-chemist-drugstore-details/79935/ajit-medical-agencies">Ajit Medical Agencies (<a href="http://www.medicineindia.org/pharmacy-chemist-drugstore-details/79935/ajit-medical-agencies">//www.medicineindia.org/pharmacy-chemist-drugstore-details/79935/ajit-medical-agencies</a>)</a>     |
| <a href="http://www.medicineindia.org/pharmacy-chemist-drugstore-details/79820/anand-medicos">Anand Medicos (<a href="http://www.medicineindia.org/pharmacy-chemist-drugstore-details/79820/anand-medicos">//www.medicineindia.org/pharmacy-chemist-drugstore-details/79820/anand-medicos</a>)</a>                                     |
| <a href="http://www.medicineindia.org/pharmacy-chemist-drugstore-details/79827/anil-medicos-pvt-ltd">Anil Medicos Pvt Ltd (<a href="http://www.medicineindia.org/pharmacy-chemist-drugstore-details/79827/anil-medicos-pvt-ltd">//www.medicineindia.org/pharmacy-chemist-drugstore-details/79827/anil-medicos-pvt-ltd</a>)</a>         |
| <a href="http://www.medicineindia.org/pharmacy-chemist-drugstore-details/79894/arun-medicos">Arun Medicos (<a href="http://www.medicineindia.org/pharmacy-chemist-drugstore-details/79894/arun-medicos">//www.medicineindia.org/pharmacy-chemist-drugstore-details/79894/arun-medicos</a>)</a>                                         |
| <a href="http://www.medicineindia.org/pharmacy-chemist-drugstore-details/79897/aryan-medical-hall">Aryan Medical Hall (<a href="http://www.medicineindia.org/pharmacy-chemist-drugstore-details/79897/aryan-medical-hall">//www.medicineindia.org/pharmacy-chemist-drugstore-details/79897/aryan-medical-hall</a>)</a>                 |
| <a href="http://www.medicineindia.org/pharmacy-chemist-drugstore-details/82654/aryan-pharma">Aryan Pharma (<a href="http://www.medicineindia.org/pharmacy-chemist-drugstore-details/82654/aryan-pharma">//www.medicineindia.org/pharmacy-chemist-drugstore-details/82654/aryan-pharma</a>)</a>                                         |
| <a href="http://www.medicineindia.org/pharmacy-chemist-drugstore-details/79832/asho-madicoes">Asho Madicoes (<a href="http://www.medicineindia.org/pharmacy-chemist-drugstore-details/79832/asho-madicoes">//www.medicineindia.org/pharmacy-chemist-drugstore-details/79832/asho-madicoes</a>)</a>                                     |
| <a href="http://www.medicineindia.org/pharmacy-chemist-drugstore-details/79953/ashok-a-medical-hall">Ashok A Medical Hall (<a href="http://www.medicineindia.org/pharmacy-chemist-drugstore-details/79953/ashok-a-medical-hall">//www.medicineindia.org/pharmacy-chemist-drugstore-details/79953/ashok-a-medical-hall</a>)</a>         |
| <a href="http://www.medicineindia.org/pharmacy-chemist-drugstore-details/79947/ayusearch-drugs-lab">Ayusearch Drugs &amp; Lab (<a href="http://www.medicineindia.org/pharmacy-chemist-drugstore-details/79947/ayusearch-drugs-lab">//www.medicineindia.org/pharmacy-chemist-drugstore-details/79947/ayusearch-drugs-lab</a>)</a>       |
| <a href="http://www.medicineindia.org/pharmacy-chemist-drugstore-details/79826/b-d-pharma">B D Pharma (<a href="http://www.medicineindia.org/pharmacy-chemist-drugstore-details/79826/b-d-pharma">//www.medicineindia.org/pharmacy-chemist-drugstore-details/79826/b-d-pharma</a>)</a>                                                 |
| <a href="http://www.medicineindia.org/pharmacy-chemist-drugstore-details/79922/bhagwati-medical-ag">Bhagwati Medical Agencies (<a href="http://www.medicineindia.org/pharmacy-chemist-drugstore-details/79922/bhagwati-medical-ag">//www.medicineindia.org/pharmacy-chemist-drugstore-details/79922/bhagwati-medical-ag</a>)</a>       |
| <a href="http://www.medicineindia.org/pharmacy-chemist-drugstore-details/79813/bharat-medical-compar">Bharat Medical Company (<a href="http://www.medicineindia.org/pharmacy-chemist-drugstore-details/79813/bharat-medical-compar">//www.medicineindia.org/pharmacy-chemist-drugstore-details/79813/bharat-medical-compar</a>)</a>    |
| <a href="http://www.medicineindia.org/pharmacy-chemist-drugstore-details/79875/bhatia-medical-hall">Bhatia Medical Hall (<a href="http://www.medicineindia.org/pharmacy-chemist-drugstore-details/79875/bhatia-medical-hall">//www.medicineindia.org/pharmacy-chemist-drugstore-details/79875/bhatia-medical-hall</a>)</a>             |
| <a href="http://www.medicineindia.org/pharmacy-chemist-drugstore-details/79909/bhatia-medicos">Bhatia Medicos (<a href="http://www.medicineindia.org/pharmacy-chemist-drugstore-details/79909/bhatia-medicos">//www.medicineindia.org/pharmacy-chemist-drugstore-details/79909/bhatia-medicos</a>)</a>                                 |
| <a href="http://www.medicineindia.org/pharmacy-chemist-drugstore-details/79828/bhutani-medical-hall">Bhutani Medical Hall (<a href="http://www.medicineindia.org/pharmacy-chemist-drugstore-details/79828/bhutani-medical-hall">//www.medicineindia.org/pharmacy-chemist-drugstore-details/79828/bhutani-medical-hall</a>)</a>         |
|                                                                                                                                                                                                                                                                                                                                        |

|                                                                                                                                                                                                                             |
|-----------------------------------------------------------------------------------------------------------------------------------------------------------------------------------------------------------------------------|
| Bhutani Medical Hall ( <a href="https://www.medicineindia.org/pharmacy-chemist-drugstore-details/79866/bhutani-medical-hall">//www.medicineindia.org/pharmacy-chemist-drugstore-details/79866/bhutani-medical-hall</a> )    |
| Bhutani Medical Store ( <a href="https://www.medicineindia.org/pharmacy-chemist-drugstore-details/79929/bhutani-medical-store">//www.medicineindia.org/pharmacy-chemist-drugstore-details/79929/bhutani-medical-store</a> ) |
| Bramh Aushdhalay ( <a href="https://www.medicineindia.org/pharmacy-chemist-drugstore-details/79837/bramh-aushdhalay">//www.medicineindia.org/pharmacy-chemist-drugstore-details/79837/bramh-aushdhalay</a> )                |
| Chahal Medical Hall ( <a href="https://www.medicineindia.org/pharmacy-chemist-drugstore-details/82647/chahal-medical-hall">//www.medicineindia.org/pharmacy-chemist-drugstore-details/82647/chahal-medical-hall</a> )       |
| Chaman Medicos ( <a href="https://www.medicineindia.org/pharmacy-chemist-drugstore-details/79938/chaman-medicos">//www.medicineindia.org/pharmacy-chemist-drugstore-details/79938/chaman-medicos</a> )                      |
| Chawla Medical Hall ( <a href="https://www.medicineindia.org/pharmacy-chemist-drugstore-details/79869/chawla-medical-hall">//www.medicineindia.org/pharmacy-chemist-drugstore-details/79869/chawla-medical-hall</a> )       |
| Chawla Medicos ( <a href="https://www.medicineindia.org/pharmacy-chemist-drugstore-details/79855/chawla-medicos">//www.medicineindia.org/pharmacy-chemist-drugstore-details/79855/chawla-medicos</a> )                      |
| Chirag Medicose ( <a href="https://www.medicineindia.org/pharmacy-chemist-drugstore-details/79946/chirag-medicose">//www.medicineindia.org/pharmacy-chemist-drugstore-details/79946/chirag-medicose</a> )                   |
| Chugh Medicos ( <a href="https://www.medicineindia.org/pharmacy-chemist-drugstore-details/79818/chugh-medicos">//www.medicineindia.org/pharmacy-chemist-drugstore-details/79818/chugh-medicos</a> )                         |
| City Medicos ( <a href="https://www.medicineindia.org/pharmacy-chemist-drugstore-details/79936/city-medicos">//www.medicineindia.org/pharmacy-chemist-drugstore-details/79936/city-medicos</a> )                            |
| D.E Medicose ( <a href="https://www.medicineindia.org/pharmacy-chemist-drugstore-details/79835/de-medicose">//www.medicineindia.org/pharmacy-chemist-drugstore-details/79835/de-medicose</a> )                              |
| DEV Pharma ( <a href="https://www.medicineindia.org/pharmacy-chemist-drugstore-details/79839/dev-pharma">//www.medicineindia.org/pharmacy-chemist-drugstore-details/79839/dev-pharma</a> )                                  |
| Dahiya Medical Store ( <a href="https://www.medicineindia.org/pharmacy-chemist-drugstore-details/79850/dahiya-medical-store">//www.medicineindia.org/pharmacy-chemist-drugstore-details/79850/dahiya-medical-store</a> )    |
| Daya Nand Medicos Agencies ( <a href="https://www.medicineindia.org/pharmacy-chemist-drugstore-details/79908/daya-nand-medicos">//www.medicineindia.org/pharmacy-chemist-drugstore-details/79908/daya-nand-medicos</a> )    |
| Deep Madical Hall ( <a href="https://www.medicineindia.org/pharmacy-chemist-drugstore-details/79944/deep-madical-hall">//www.medicineindia.org/pharmacy-chemist-drugstore-details/79944/deep-madical-hall</a> )             |
| Deep Medicos ( <a href="https://www.medicineindia.org/pharmacy-chemist-drugstore-details/79913/deep-medicos">//www.medicineindia.org/pharmacy-chemist-drugstore-details/79913/deep-medicos</a> )                            |
| Dev Pharma ( <a href="https://www.medicineindia.org/pharmacy-chemist-drugstore-details/82461/dev-pharma">//www.medicineindia.org/pharmacy-chemist-drugstore-details/82461/dev-pharma</a> )                                  |
| Dhall Medicose ( <a href="https://www.medicineindia.org/pharmacy-chemist-drugstore-details/79876/dhall-medicose">//www.medicineindia.org/pharmacy-chemist-drugstore-details/79876/dhall-medicose</a> )                      |
| Dhruv Medical Hall ( <a href="https://www.medicineindia.org/pharmacy-chemist-drugstore-details/79889/dhruv-medical-hall">//www.medicineindia.org/pharmacy-chemist-drugstore-details/79889/dhruv-medical-hall</a> )          |
| Dhruv Medical Store ( <a href="https://www.medicineindia.org/pharmacy-chemist-drugstore-details/79882/dhruv-medical-store">//www.medicineindia.org/pharmacy-chemist-drugstore-details/79882/dhruv-medical-store</a> )       |
| Dinesh Medicos ( <a href="https://www.medicineindia.org/pharmacy-chemist-drugstore-details/79847/dinesh-medicos">//www.medicineindia.org/pharmacy-chemist-drugstore-details/79847/dinesh-medicos</a> )                      |
| Doctor Medicos ( <a href="https://www.medicineindia.org/pharmacy-chemist-drugstore-details/79848/doctor-medicos">//www.medicineindia.org/pharmacy-chemist-drugstore-details/79848/doctor-medicos</a> )                      |
| Dr Jains Life Science ( <a href="https://www.medicineindia.org/pharmacy-chemist-drugstore-details/79887/dr-jains-life-science">//www.medicineindia.org/pharmacy-chemist-drugstore-details/79887/dr-jains-life-science</a> ) |
| Durga Medical Hall ( <a href="https://www.medicineindia.org/pharmacy-chemist-drugstore-details/79883/durga-medical-hall">//www.medicineindia.org/pharmacy-chemist-drugstore-details/79883/durga-medical-hall</a> )          |
| Friends Pharma ( <a href="https://www.medicineindia.org/pharmacy-chemist-drugstore-details/79815/friends-pharma">//www.medicineindia.org/pharmacy-chemist-drugstore-details/79815/friends-pharma</a> )                      |
| G K Medicos ( <a href="https://www.medicineindia.org/pharmacy-chemist-drugstore-details/79945/g-k-medicos">//www.medicineindia.org/pharmacy-chemist-drugstore-details/79945/g-k-medicos</a> )                               |
|                                                                                                                                                                                                                             |



|                                                                                                                                                                                                                                   |
|-----------------------------------------------------------------------------------------------------------------------------------------------------------------------------------------------------------------------------------|
| Gandhi Medical Hall ( <a href="https://www.medicineindia.org/pharmacy-chemist-drugstore-details/79921/gandhi-medical-hall">//www.medicineindia.org/pharmacy-chemist-drugstore-details/79921/gandhi-medical-hall</a> )             |
| Gaurav Medicos ( <a href="https://www.medicineindia.org/pharmacy-chemist-drugstore-details/79910/gaurav-medicos">//www.medicineindia.org/pharmacy-chemist-drugstore-details/79910/gaurav-medicos</a> )                            |
| Giriraj Medicos ( <a href="https://www.medicineindia.org/pharmacy-chemist-drugstore-details/79900/giriraj-medicos">//www.medicineindia.org/pharmacy-chemist-drugstore-details/79900/giriraj-medicos</a> )                         |
| Giriraj Medicos ( <a href="https://www.medicineindia.org/pharmacy-chemist-drugstore-details/79911/giriraj-medicos">//www.medicineindia.org/pharmacy-chemist-drugstore-details/79911/giriraj-medicos</a> )                         |
| Godara Medical Hall ( <a href="https://www.medicineindia.org/pharmacy-chemist-drugstore-details/79934/godara-medical-hall">//www.medicineindia.org/pharmacy-chemist-drugstore-details/79934/godara-medical-hall</a> )             |
| Goyal Medical Agency ( <a href="https://www.medicineindia.org/pharmacy-chemist-drugstore-details/79838/goyal-medical-agency">//www.medicineindia.org/pharmacy-chemist-drugstore-details/79838/goyal-medical-agency</a> )          |
| Goyal Medical Hall ( <a href="https://www.medicineindia.org/pharmacy-chemist-drugstore-details/79952/goyal-medical-hall">//www.medicineindia.org/pharmacy-chemist-drugstore-details/79952/goyal-medical-hall</a> )                |
| Gulati Medical Hall Gulati Madi ( <a href="https://www.medicineindia.org/pharmacy-chemist-drugstore-details/79830/gulati-medical-hall">//www.medicineindia.org/pharmacy-chemist-drugstore-details/79830/gulati-medical-hall</a> ) |
| Gulati Medicose ( <a href="https://www.medicineindia.org/pharmacy-chemist-drugstore-details/79877/gulati-medicose">//www.medicineindia.org/pharmacy-chemist-drugstore-details/79877/gulati-medicose</a> )                         |
| Gunjan Medical Hall ( <a href="https://www.medicineindia.org/pharmacy-chemist-drugstore-details/79833/gunjan-medical-hall">//www.medicineindia.org/pharmacy-chemist-drugstore-details/79833/gunjan-medical-hall</a> )             |
| Gunjan Medical Hall ( <a href="https://www.medicineindia.org/pharmacy-chemist-drugstore-details/79874/gunjan-medical-hall">//www.medicineindia.org/pharmacy-chemist-drugstore-details/79874/gunjan-medical-hall</a> )             |
| Gupta Medicos ( <a href="https://www.medicineindia.org/pharmacy-chemist-drugstore-details/79819/gupta-medicos">//www.medicineindia.org/pharmacy-chemist-drugstore-details/79819/gupta-medicos</a> )                               |
| Hare Krishana Medicos ( <a href="https://www.medicineindia.org/pharmacy-chemist-drugstore-details/79902/hare-krishana-medicos">//www.medicineindia.org/pharmacy-chemist-drugstore-details/79902/hare-krishana-medicos</a> )       |
| Haryana Medical Hall ( <a href="https://www.medicineindia.org/pharmacy-chemist-drugstore-details/79933/haryana-medical-hall">//www.medicineindia.org/pharmacy-chemist-drugstore-details/79933/haryana-medical-hall</a> )          |
| Hemant Medical Agencies ( <a href="https://www.medicineindia.org/pharmacy-chemist-drugstore-details/79823/hemant-medical-agencies">//www.medicineindia.org/pharmacy-chemist-drugstore-details/79823/hemant-medical-agencies</a> ) |
| Huria Medical Store ( <a href="https://www.medicineindia.org/pharmacy-chemist-drugstore-details/79896/huria-medical-store">//www.medicineindia.org/pharmacy-chemist-drugstore-details/79896/huria-medical-store</a> )             |
| Huria Medicose ( <a href="https://www.medicineindia.org/pharmacy-chemist-drugstore-details/79872/huria-medicose">//www.medicineindia.org/pharmacy-chemist-drugstore-details/79872/huria-medicose</a> )                            |
| J P Medical Agencies ( <a href="https://www.medicineindia.org/pharmacy-chemist-drugstore-details/79926/j-p-medical-agencies">//www.medicineindia.org/pharmacy-chemist-drugstore-details/79926/j-p-medical-agencies</a> )          |
| JAI Durga Medical Hall ( <a href="https://www.medicineindia.org/pharmacy-chemist-drugstore-details/79919/jai-durga-medical-hall">//www.medicineindia.org/pharmacy-chemist-drugstore-details/79919/jai-durga-medical-hall</a> )    |
| JAI Hanuman Medicals ( <a href="https://www.medicineindia.org/pharmacy-chemist-drugstore-details/79939/jai-hanuman-medicals">//www.medicineindia.org/pharmacy-chemist-drugstore-details/79939/jai-hanuman-medicals</a> )          |
| JAI Shri Ram Medicos ( <a href="https://www.medicineindia.org/pharmacy-chemist-drugstore-details/79829/jai-shri-ram-medicos">//www.medicineindia.org/pharmacy-chemist-drugstore-details/79829/jai-shri-ram-medicos</a> )          |
| Jagdamba Medical Store ( <a href="https://www.medicineindia.org/pharmacy-chemist-drugstore-details/79903/jagdamba-medical-store">//www.medicineindia.org/pharmacy-chemist-drugstore-details/79903/jagdamba-medical-store</a> )    |
| Jagdambe Medicos ( <a href="https://www.medicineindia.org/pharmacy-chemist-drugstore-details/79845/jagdambe-medicos">//www.medicineindia.org/pharmacy-chemist-drugstore-details/79845/jagdambe-medicos</a> )                      |
| Janta Medical Store ( <a href="https://www.medicineindia.org/pharmacy-chemist-drugstore-details/79940/janta-medical-store">//www.medicineindia.org/pharmacy-chemist-drugstore-details/79940/janta-medical-store</a> )             |
| Jeet Medicos ( <a href="https://www.medicineindia.org/pharmacy-chemist-drugstore-details/79941/jeet-medicos">//www.medicineindia.org/pharmacy-chemist-drugstore-details/79941/jeet-medicos</a> )                                  |
| Jenta Medical Store ( <a href="https://www.medicineindia.org/pharmacy-chemist-drugstore-details/79858/jenta-medical-store">//www.medicineindia.org/pharmacy-chemist-drugstore-details/79858/jenta-medical-store</a> )             |

|                                                                                                                                                                                                                                         |
|-----------------------------------------------------------------------------------------------------------------------------------------------------------------------------------------------------------------------------------------|
| Jia Shri Ram Medicose ( <a href="https://www.medicineindia.org/pharmacy-chemist-drugstore-details/79949/jia-shri-ram-medicose">//www.medicineindia.org/pharmacy-chemist-drugstore-details/79949/jia-shri-ram-medicose</a> )             |
| Juneja Medical Store ( <a href="https://www.medicineindia.org/pharmacy-chemist-drugstore-details/79870/juneja-medical-store">//www.medicineindia.org/pharmacy-chemist-drugstore-details/79870/juneja-medical-store</a> )                |
| Kamal Medical Hall ( <a href="https://www.medicineindia.org/pharmacy-chemist-drugstore-details/79948/kamal-medical-hall">//www.medicineindia.org/pharmacy-chemist-drugstore-details/79948/kamal-medical-hall</a> )                      |
| Kamal Medical Store ( <a href="https://www.medicineindia.org/pharmacy-chemist-drugstore-details/79950/kamal-medical-store">//www.medicineindia.org/pharmacy-chemist-drugstore-details/79950/kamal-medical-store</a> )                   |
| Kataria Medical Hall ( <a href="https://www.medicineindia.org/pharmacy-chemist-drugstore-details/79812/kataria-medical-hall">//www.medicineindia.org/pharmacy-chemist-drugstore-details/79812/kataria-medical-hall</a> )                |
| Kathuria Dawai Wala ( <a href="https://www.medicineindia.org/pharmacy-chemist-drugstore-details/79854/kathuria-dawai-wala">//www.medicineindia.org/pharmacy-chemist-drugstore-details/79854/kathuria-dawai-wala</a> )                   |
| Khurana Dawakhana ( <a href="https://www.medicineindia.org/pharmacy-chemist-drugstore-details/79840/khurana-dawakhana">//www.medicineindia.org/pharmacy-chemist-drugstore-details/79840/khurana-dawakhana</a> )                         |
| Khurana Pharmacy ( <a href="https://www.medicineindia.org/pharmacy-chemist-drugstore-details/79816/khurana-pharmacy">//www.medicineindia.org/pharmacy-chemist-drugstore-details/79816/khurana-pharmacy</a> )                            |
| Kissan Medical Agency ( <a href="https://www.medicineindia.org/pharmacy-chemist-drugstore-details/79831/kissan-medical-agency">//www.medicineindia.org/pharmacy-chemist-drugstore-details/79831/kissan-medical-agency</a> )             |
| Krishana Medicose ( <a href="https://www.medicineindia.org/pharmacy-chemist-drugstore-details/79954/krishana-medicose">//www.medicineindia.org/pharmacy-chemist-drugstore-details/79954/krishana-medicose</a> )                         |
| Kurana Farmashi ( <a href="https://www.medicineindia.org/pharmacy-chemist-drugstore-details/79884/kurana-farmashi">//www.medicineindia.org/pharmacy-chemist-drugstore-details/79884/kurana-farmashi</a> )                               |
| M.J. Sales Chemist ( <a href="https://www.medicineindia.org/pharmacy-chemist-drugstore-details/79878/mj-sales-chemist">//www.medicineindia.org/pharmacy-chemist-drugstore-details/79878/mj-sales-chemist</a> )                          |
| Malik Medical Agencies ( <a href="https://www.medicineindia.org/pharmacy-chemist-drugstore-details/79906/malik-medical-agencies">//www.medicineindia.org/pharmacy-chemist-drugstore-details/79906/malik-medical-agencies</a> )          |
| Malik Medical Store ( <a href="https://www.medicineindia.org/pharmacy-chemist-drugstore-details/79871/malik-medical-store">//www.medicineindia.org/pharmacy-chemist-drugstore-details/79871/malik-medical-store</a> )                   |
| Malik Medical Store ( <a href="https://www.medicineindia.org/pharmacy-chemist-drugstore-details/79898/malik-medical-store">//www.medicineindia.org/pharmacy-chemist-drugstore-details/79898/malik-medical-store</a> )                   |
| Midha Medical Store ( <a href="https://www.medicineindia.org/pharmacy-chemist-drugstore-details/79873/midha-medical-store">//www.medicineindia.org/pharmacy-chemist-drugstore-details/79873/midha-medical-store</a> )                   |
| Monu medical hall ( <a href="https://www.medicineindia.org/pharmacy-chemist-drugstore-details/81766/monu-medical-hall">//www.medicineindia.org/pharmacy-chemist-drugstore-details/81766/monu-medical-hall</a> )                         |
| Nagpal Medical Store ( <a href="https://www.medicineindia.org/pharmacy-chemist-drugstore-details/79824/nagpal-medical-store">//www.medicineindia.org/pharmacy-chemist-drugstore-details/79824/nagpal-medical-store</a> )                |
| National Medical Agencies ( <a href="https://www.medicineindia.org/pharmacy-chemist-drugstore-details/79927/national-medical-agency">//www.medicineindia.org/pharmacy-chemist-drugstore-details/79927/national-medical-agency</a> )     |
| National Medical Hall ( <a href="https://www.medicineindia.org/pharmacy-chemist-drugstore-details/79925/national-medical-hall">//www.medicineindia.org/pharmacy-chemist-drugstore-details/79925/national-medical-hall</a> )             |
| New Jyoti Medical Hall ( <a href="https://www.medicineindia.org/pharmacy-chemist-drugstore-details/79864/new-jyoti-medical-hall">//www.medicineindia.org/pharmacy-chemist-drugstore-details/79864/new-jyoti-medical-hall</a> )          |
| Niranjan Dass Jaswant RAI ( <a href="https://www.medicineindia.org/pharmacy-chemist-drugstore-details/79892/niranjan-dass-jaswant-rai">//www.medicineindia.org/pharmacy-chemist-drugstore-details/79892/niranjan-dass-jaswant-rai</a> ) |
| Nishil Medicos ( <a href="https://www.medicineindia.org/pharmacy-chemist-drugstore-details/82250/nishil-medicos">//www.medicineindia.org/pharmacy-chemist-drugstore-details/82250/nishil-medicos</a> )                                  |
| Nishil Medicos ( <a href="https://www.medicineindia.org/pharmacy-chemist-drugstore-details/82697/nishil-medicos">//www.medicineindia.org/pharmacy-chemist-drugstore-details/82697/nishil-medicos</a> )                                  |
| Nitin Medical Store ( <a href="https://www.medicineindia.org/pharmacy-chemist-drugstore-details/79867/nitin-medical-store">//www.medicineindia.org/pharmacy-chemist-drugstore-details/79867/nitin-medical-store</a> )                   |
| OM Medical Agency ( <a href="https://www.medicineindia.org/pharmacy-chemist-drugstore-details/79811/om-medical-agency">//www.medicineindia.org/pharmacy-chemist-drugstore-details/79811/om-medical-agency</a> )                         |
|                                                                                                                                                                                                                                         |

|                                                                                                                                                                                                                                |
|--------------------------------------------------------------------------------------------------------------------------------------------------------------------------------------------------------------------------------|
| OM Medicos ( <a href="https://www.medicineindia.org/pharmacy-chemist-drugstore-details/79901/om-medicos">//www.medicineindia.org/pharmacy-chemist-drugstore-details/79901/om-medicos</a> )                                     |
| Om Medical Hall ( <a href="https://www.medicineindia.org/pharmacy-chemist-drugstore-details/79809/om-medical-hall">//www.medicineindia.org/pharmacy-chemist-drugstore-details/79809/om-medical-hall</a> )                      |
| Pal Medical Hall ( <a href="https://www.medicineindia.org/pharmacy-chemist-drugstore-details/79856/pal-medical-hall">//www.medicineindia.org/pharmacy-chemist-drugstore-details/79856/pal-medical-hall</a> )                   |
|                                                                                                                                                                                                                                |
| Pambu ENT ( <a href="https://www.medicineindia.org/pharmacy-chemist-drugstore-details/79942/pambu-ent">//www.medicineindia.org/pharmacy-chemist-drugstore-details/79942/pambu-ent</a> )                                        |
| Paras Medicals ( <a href="https://www.medicineindia.org/pharmacy-chemist-drugstore-details/79844/paras-medicals">//www.medicineindia.org/pharmacy-chemist-drugstore-details/79844/paras-medicals</a> )                         |
| Paras Medicos ( <a href="https://www.medicineindia.org/pharmacy-chemist-drugstore-details/79886/paras-medicos">//www.medicineindia.org/pharmacy-chemist-drugstore-details/79886/paras-medicos</a> )                            |
| Parkash Medicos ( <a href="https://www.medicineindia.org/pharmacy-chemist-drugstore-details/79907/parkash-medicos">//www.medicineindia.org/pharmacy-chemist-drugstore-details/79907/parkash-medicos</a> )                      |
| Pavit Medical Agencies ( <a href="https://www.medicineindia.org/pharmacy-chemist-drugstore-details/79821/pavit-medical-agencies">//www.medicineindia.org/pharmacy-chemist-drugstore-details/79821/pavit-medical-agencies</a> ) |
| Pawaia Medicals ( <a href="https://www.medicineindia.org/pharmacy-chemist-drugstore-details/79836/pawaia-medicals">//www.medicineindia.org/pharmacy-chemist-drugstore-details/79836/pawaia-medicals</a> )                      |
| Pawan Medical Hall ( <a href="https://www.medicineindia.org/pharmacy-chemist-drugstore-details/79930/pawan-medical-hall">//www.medicineindia.org/pharmacy-chemist-drugstore-details/79930/pawan-medical-hall</a> )             |
| Pharma Ghar ( <a href="https://www.medicineindia.org/pharmacy-chemist-drugstore-details/82528/pharma-ghar">//www.medicineindia.org/pharmacy-chemist-drugstore-details/82528/pharma-ghar</a> )                                  |
| Prakash Medical Store ( <a href="https://www.medicineindia.org/pharmacy-chemist-drugstore-details/79841/prakash-medical-store">//www.medicineindia.org/pharmacy-chemist-drugstore-details/79841/prakash-medical-store</a> )    |
| Prakash Medicos ( <a href="https://www.medicineindia.org/pharmacy-chemist-drugstore-details/79814/prakash-medicos">//www.medicineindia.org/pharmacy-chemist-drugstore-details/79814/prakash-medicos</a> )                      |
| Prem Medicose ( <a href="https://www.medicineindia.org/pharmacy-chemist-drugstore-details/79868/prem-medicose">//www.medicineindia.org/pharmacy-chemist-drugstore-details/79868/prem-medicose</a> )                            |
| Punjab Medical & General Store ( <a href="https://www.medicineindia.org/pharmacy-chemist-drugstore-details/79817/punjab-medical">//www.medicineindia.org/pharmacy-chemist-drugstore-details/79817/punjab-medical</a> )         |
| Punjab Medical Genral Store ( <a href="https://www.medicineindia.org/pharmacy-chemist-drugstore-details/79843/punjab-medical-gen">//www.medicineindia.org/pharmacy-chemist-drugstore-details/79843/punjab-medical-gen</a> )    |
| R K Medical Hall ( <a href="https://www.medicineindia.org/pharmacy-chemist-drugstore-details/79923/r-k-medical-hall">//www.medicineindia.org/pharmacy-chemist-drugstore-details/79923/r-k-medical-hall</a> )                   |
| R P Medical Store ( <a href="https://www.medicineindia.org/pharmacy-chemist-drugstore-details/79905/r-p-medical-store">//www.medicineindia.org/pharmacy-chemist-drugstore-details/79905/r-p-medical-store</a> )                |
| Rachit Medical Hall ( <a href="https://www.medicineindia.org/pharmacy-chemist-drugstore-details/79943/rachit-medical-hall">//www.medicineindia.org/pharmacy-chemist-drugstore-details/79943/rachit-medical-hall</a> )          |
| Radha Swami Medical Hall ( <a href="https://www.medicineindia.org/pharmacy-chemist-drugstore-details/79822/radha-swami-medical">//www.medicineindia.org/pharmacy-chemist-drugstore-details/79822/radha-swami-medical</a> )     |
| Rahul Medical Hall ( <a href="https://www.medicineindia.org/pharmacy-chemist-drugstore-details/79862/rahul-medical-hall">//www.medicineindia.org/pharmacy-chemist-drugstore-details/79862/rahul-medical-hall</a> )             |
| Raja Medicos ( <a href="https://www.medicineindia.org/pharmacy-chemist-drugstore-details/79890/raja-medicos">//www.medicineindia.org/pharmacy-chemist-drugstore-details/79890/raja-medicos</a> )                               |
| Raja Medicos ( <a href="https://www.medicineindia.org/pharmacy-chemist-drugstore-details/79912/raja-medicos">//www.medicineindia.org/pharmacy-chemist-drugstore-details/79912/raja-medicos</a> )                               |
| Rajiv Medical Store ( <a href="https://www.medicineindia.org/pharmacy-chemist-drugstore-details/79834/rajiv-medical-store">//www.medicineindia.org/pharmacy-chemist-drugstore-details/79834/rajiv-medical-store</a> )          |
| Ranjandas Jaswant RAI ( <a href="https://www.medicineindia.org/pharmacy-chemist-drugstore-details/79937/ranjandas-jaswant-rai">//www.medicineindia.org/pharmacy-chemist-drugstore-details/79937/ranjandas-jaswant-rai</a> )    |
|                                                                                                                                                                                                                                |

|                                                                                                                                                                                                                                     |
|-------------------------------------------------------------------------------------------------------------------------------------------------------------------------------------------------------------------------------------|
| Riddhi shree Medicos ( <a href="https://www.medicineindia.org/pharmacy-chemist-drugstore-details/79893/riddhi-shree-medicos">//www.medicineindia.org/pharmacy-chemist-drugstore-details/79893/riddhi-shree-medicos</a> )            |
| Rohilla Medicos ( <a href="https://www.medicineindia.org/pharmacy-chemist-drugstore-details/79849/rohilla-medicos">//www.medicineindia.org/pharmacy-chemist-drugstore-details/79849/rohilla-medicos</a> )                           |
| Rohtak Medical Agencies ( <a href="https://www.medicineindia.org/pharmacy-chemist-drugstore-details/79808/rohtak-medical-agencie">//www.medicineindia.org/pharmacy-chemist-drugstore-details/79808/rohtak-medical-agencie</a> )     |
| SH. SAI Baba Medicos ( <a href="https://www.medicineindia.org/pharmacy-chemist-drugstore-details/79810/sh-sai-baba-medicos">//www.medicineindia.org/pharmacy-chemist-drugstore-details/79810/sh-sai-baba-medicos</a> )              |
| Sabharwal Medical Store ( <a href="https://www.medicineindia.org/pharmacy-chemist-drugstore-details/79920/sabharwal-medical-stor">//www.medicineindia.org/pharmacy-chemist-drugstore-details/79920/sabharwal-medical-stor</a> )     |
| Sachdeva Medical Agencies ( <a href="https://www.medicineindia.org/pharmacy-chemist-drugstore-details/79928/sachdeva-medical-a">//www.medicineindia.org/pharmacy-chemist-drugstore-details/79928/sachdeva-medical-a</a> )           |
| Sanjay Chemist ( <a href="https://www.medicineindia.org/pharmacy-chemist-drugstore-details/79842/sanjay-chemist">//www.medicineindia.org/pharmacy-chemist-drugstore-details/79842/sanjay-chemist</a> )                              |
| Sanjeev Ayurvedic Store ( <a href="https://www.medicineindia.org/pharmacy-chemist-drugstore-details/82388/sanjeev-ayurvedic-store">//www.medicineindia.org/pharmacy-chemist-drugstore-details/82388/sanjeev-ayurvedic-store</a> )   |
| Sawan Medicos ( <a href="https://www.medicineindia.org/pharmacy-chemist-drugstore-details/79895/sawan-medicos">//www.medicineindia.org/pharmacy-chemist-drugstore-details/79895/sawan-medicos</a> )                                 |
| Shanti Medicos ( <a href="https://www.medicineindia.org/pharmacy-chemist-drugstore-details/79904/shanti-medicos">//www.medicineindia.org/pharmacy-chemist-drugstore-details/79904/shanti-medicos</a> )                              |
| Shirdi Medicos ( <a href="https://www.medicineindia.org/pharmacy-chemist-drugstore-details/79888/shirdi-medicos">//www.medicineindia.org/pharmacy-chemist-drugstore-details/79888/shirdi-medicos</a> )                              |
| Shiv Medical Agencies ( <a href="https://www.medicineindia.org/pharmacy-chemist-drugstore-details/79932/shiv-medical-agencies">//www.medicineindia.org/pharmacy-chemist-drugstore-details/79932/shiv-medical-agencies</a> )         |
| Shiv Medical Store ( <a href="https://www.medicineindia.org/pharmacy-chemist-drugstore-details/79853/shiv-medical-store">//www.medicineindia.org/pharmacy-chemist-drugstore-details/79853/shiv-medical-store</a> )                  |
| Shiv Pharma Traders ( <a href="https://www.medicineindia.org/pharmacy-chemist-drugstore-details/79825/shiv-pharma-traders">//www.medicineindia.org/pharmacy-chemist-drugstore-details/79825/shiv-pharma-traders</a> )               |
| Shiv Shakti Medical Store ( <a href="https://www.medicineindia.org/pharmacy-chemist-drugstore-details/79859/shiv-shakti-medical-sto">//www.medicineindia.org/pharmacy-chemist-drugstore-details/79859/shiv-shakti-medical-sto</a> ) |
| Shree Ganpati Medicose ( <a href="https://www.medicineindia.org/pharmacy-chemist-drugstore-details/79879/shree-ganpati-medicose">//www.medicineindia.org/pharmacy-chemist-drugstore-details/79879/shree-ganpati-medicose</a> )      |
| Shree hari medical hall ( <a href="https://www.medicineindia.org/pharmacy-chemist-drugstore-details/82656/shree-hari-medical-hall">//www.medicineindia.org/pharmacy-chemist-drugstore-details/82656/shree-hari-medical-hall</a> )   |
| Singhle Medical Store ( <a href="https://www.medicineindia.org/pharmacy-chemist-drugstore-details/79881/singhle-medical-store">//www.medicineindia.org/pharmacy-chemist-drugstore-details/79881/singhle-medical-store</a> )         |
| Subhash Medical Hall ( <a href="https://www.medicineindia.org/pharmacy-chemist-drugstore-details/79931/subhash-medical-hall">//www.medicineindia.org/pharmacy-chemist-drugstore-details/79931/subhash-medical-hall</a> )            |
| Subhash Medicos ( <a href="https://www.medicineindia.org/pharmacy-chemist-drugstore-details/79846/subhash-medicos">//www.medicineindia.org/pharmacy-chemist-drugstore-details/79846/subhash-medicos</a> )                           |
| Suneja Medical ( <a href="https://www.medicineindia.org/pharmacy-chemist-drugstore-details/79924/suneja-medical">//www.medicineindia.org/pharmacy-chemist-drugstore-details/79924/suneja-medical</a> )                              |
| Sunny Medical Store ( <a href="https://www.medicineindia.org/pharmacy-chemist-drugstore-details/79861/sunny-medical-store">//www.medicineindia.org/pharmacy-chemist-drugstore-details/79861/sunny-medical-store</a> )               |
| Supreme Medical ( <a href="https://www.medicineindia.org/pharmacy-chemist-drugstore-details/79918/supreme-medical">//www.medicineindia.org/pharmacy-chemist-drugstore-details/79918/supreme-medical</a> )                           |
| Taneja Medical Store ( <a href="https://www.medicineindia.org/pharmacy-chemist-drugstore-details/79851/taneja-medical-store">//www.medicineindia.org/pharmacy-chemist-drugstore-details/79851/taneja-medical-store</a> )            |
| Thukral Medical Hall ( <a href="https://www.medicineindia.org/pharmacy-chemist-drugstore-details/79880/thukral-medical-hall">//www.medicineindia.org/pharmacy-chemist-drugstore-details/79880/thukral-medical-hall</a> )            |
|                                                                                                                                                                                                                                     |
|                                                                                                                                                                                                                                     |
|                                                                                                                                                                                                                                     |

V K Medicos ([//www.medicineindia.org/pharmacy-chemist-drugstore-details/79914/v-k-medicos](http://www.medicineindia.org/pharmacy-chemist-drugstore-details/79914/v-k-medicos))

|                                                                                                                                                                                                                          |
|--------------------------------------------------------------------------------------------------------------------------------------------------------------------------------------------------------------------------|
| Vanshika Trading Co ( <a href="http://www.medicineindia.org/pharmacy-chemist-drugstore-details/79885/vanshika-trading-co">//www.medicineindia.org/pharmacy-chemist-drugstore-details/79885/vanshika-trading-co</a> )     |
| Vijay Medical Store ( <a href="http://www.medicineindia.org/pharmacy-chemist-drugstore-details/79917/vijay-medical-store">//www.medicineindia.org/pharmacy-chemist-drugstore-details/79917/vijay-medical-store</a> )     |
| Vinit Medicose ( <a href="http://www.medicineindia.org/pharmacy-chemist-drugstore-details/79865/vinit-medicose">//www.medicineindia.org/pharmacy-chemist-drugstore-details/79865/vinit-medicose</a> )                    |
| Vishnu Medicals ( <a href="http://www.medicineindia.org/pharmacy-chemist-drugstore-details/79916/vishnu-medicals">//www.medicineindia.org/pharmacy-chemist-drugstore-details/79916/vishnu-medicals</a> )                 |
| Yash Medicos ( <a href="http://www.medicineindia.org/pharmacy-chemist-drugstore-details/79857/yash-medicos">//www.medicineindia.org/pharmacy-chemist-drugstore-details/79857/yash-medicos</a> )                          |
| Yash Medicos ( <a href="http://www.medicineindia.org/pharmacy-chemist-drugstore-details/79860/yash-medicos">//www.medicineindia.org/pharmacy-chemist-drugstore-details/79860/yash-medicos</a> )                          |
| Yetichem Labs Pvt Ltd ( <a href="http://www.medicineindia.org/pharmacy-chemist-drugstore-details/79951/etichem-labs-pvt-ltd">//www.medicineindia.org/pharmacy-chemist-drugstore-details/79951/etichem-labs-pvt-ltd</a> ) |

## Recently Added Pharmacies

- NASA PHARMA, Raebareli ([//www.medicineindia.org/pharmacy-chemist-drugstore-details/82746/nasa-pharma](http://www.medicineindia.org/pharmacy-chemist-drugstore-details/82746/nasa-pharma))
- Rajasthan medical store, Ajmer ([//www.medicineindia.org/pharmacy-chemist-drugstore-details/82745/rajasthan-medical-store](http://www.medicineindia.org/pharmacy-chemist-drugstore-details/82745/rajasthan-medical-store))
- Manko pharmacy, Mumbai ([//www.medicineindia.org/pharmacy-chemist-drugstore-details/82744/manko-pharmacy](http://www.medicineindia.org/pharmacy-chemist-drugstore-details/82744/manko-pharmacy))
- GuruNanak Medical Agency, Panipat ([//www.medicineindia.org/pharmacy-chemist-drugstore-details/82743/gurunanak-medical-agency](http://www.medicineindia.org/pharmacy-chemist-drugstore-details/82743/gurunanak-medical-agency))
- VARDHMAN MEDICALHALL, Nalanda ([//www.medicineindia.org/pharmacy-chemist-drugstore-details/82742/vardhman-medicalhall](http://www.medicineindia.org/pharmacy-chemist-drugstore-details/82742/vardhman-medicalhall))
- Modern Health Care, Srinagar ([//www.medicineindia.org/pharmacy-chemist-drugstore-details/82741/modern-health-care](http://www.medicineindia.org/pharmacy-chemist-drugstore-details/82741/modern-health-care))
- a.s medicines, Aurangabad ([//www.medicineindia.org/pharmacy-chemist-drugstore-details/82740/as-medicines](http://www.medicineindia.org/pharmacy-chemist-drugstore-details/82740/as-medicines))
- MAHALAXMI MEDICO, Pune ([//www.medicineindia.org/pharmacy-chemist-drugstore-details/82739/mahalaxmi-medico](http://www.medicineindia.org/pharmacy-chemist-drugstore-details/82739/mahalaxmi-medico))
- Life Care Medical, Jorhat ([//www.medicineindia.org/pharmacy-chemist-drugstore-details/82738/life-care-medical](http://www.medicineindia.org/pharmacy-chemist-drugstore-details/82738/life-care-medical))
- Hemkunt medical hall, Moradabad ([//www.medicineindia.org/pharmacy-chemist-drugstore-details/82737/hemkunt-medical-hall](http://www.medicineindia.org/pharmacy-chemist-drugstore-details/82737/hemkunt-medical-hall))

---

## Important Links:

- Ministry of Health & Family Welfare-Government of India [↗](http://mohfw.nic.in) (<http://mohfw.nic.in>)
- Department of Health Research (DHR), Government of India [↗](http://www.dhr.gov.in) (<http://www.dhr.gov.in>)

Department of Indian Systems of Medicine and Homoeopathy [↗](http://indianmedicine.nic.in) (http://indianmedicine.nic.in)

Pharmacopoeial Laboratory for Indian Medicine (PLIM) [↗](http://www.plimism.nic.in) (http://www.plimism.nic.in)

Medicine Information Centre [↗](http://www.niper.gov.in/medicine.htm) (http://www.niper.gov.in/medicine.htm)
